# Supplementary material for: Impacts of the COVID-19 pandemic on deprivation-level differences in cardiovascular hospitalisations: a comparison of England and Denmark using the OpenSAFELY platform and National Registry Data
Source: PubMed Central journal article supplement (PMC11481132; doi:10.1136/bmjopen-2024-088710), 2024-10-15

# Supplementary materials

## Table of contents

|                                                                                                                                                                                                          |           |
|----------------------------------------------------------------------------------------------------------------------------------------------------------------------------------------------------------|-----------|
| Figure S1: COVID-19 stringency index and confirmed COVID-19 deaths in the United Kingdom and Denmark                                                                                                     | 2         |
| Table S1: Danish income quintile thresholds by age                                                                                                                                                       | 3         |
| Information governance and ethical approval                                                                                                                                                              | 6         |
| Table S2: Characteristics of English and Danish cohorts as of 1st March 2019                                                                                                                             | 7         |
| Table S3: Characteristics of English and Danish cohorts as of 1st March 2021                                                                                                                             | 9         |
| Table S4 Estimated number of events during the pre-pandemic period (May 2018-February 2020) and during the pandemic period (March 2020-December 2021) with and without COVID-19 restrictions in England. | 11        |
| Table S5 Estimated number of events during the pre-pandemic period (May 2018-February 2020) and during the pandemic period (March 2020-December 2021) with and without COVID-19 restrictions in Denmark. | <b>14</b> |
| Figure S2: Monthly change (first derivative) in percentage of population with hospital admissions for each outcome in England                                                                            | 17        |
| Figure S3: Monthly change (first derivative) in percentage of population with hospital admissions for each outcome in Denmark                                                                            | 18        |

Figure S1: COVID-19 stringency index and confirmed COVID-19 deaths in the United Kingdom and Denmark

### COVID-19: Stringency Index

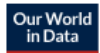

The stringency index is a composite measure based on nine response indicators including school closures, workplace closures, and travel bans, rescaled to a value from 0 to 100 (100 = strictest).

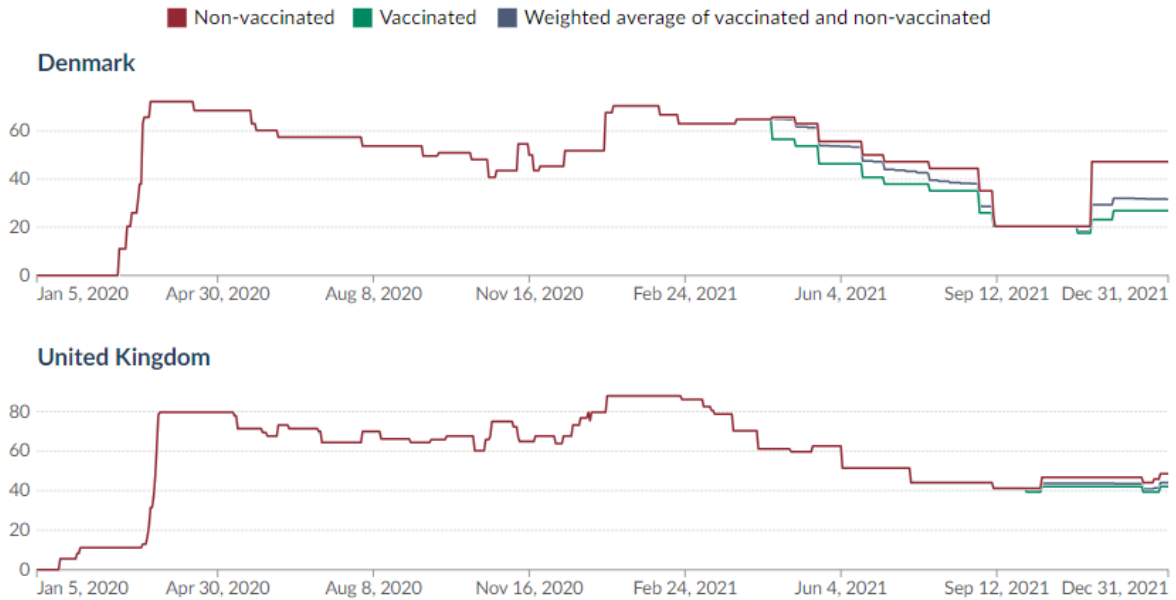

Data source: Hale, T., Angrist, N., Goldszmidt, R. et al. A global panel database of pandemic policies (Oxford COVID-19 Government Response Tracker). Nat Hum Behav 5, 529–538 (2021). <https://doi.org/10.1038/s41562-021-01079-8>  
 CC BY

## Daily new confirmed COVID-19 deaths per million people

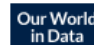

7-day rolling average. Due to varying protocols and challenges in the attribution of the cause of death, the number of confirmed deaths may not accurately represent the true number of deaths caused by COVID-19.

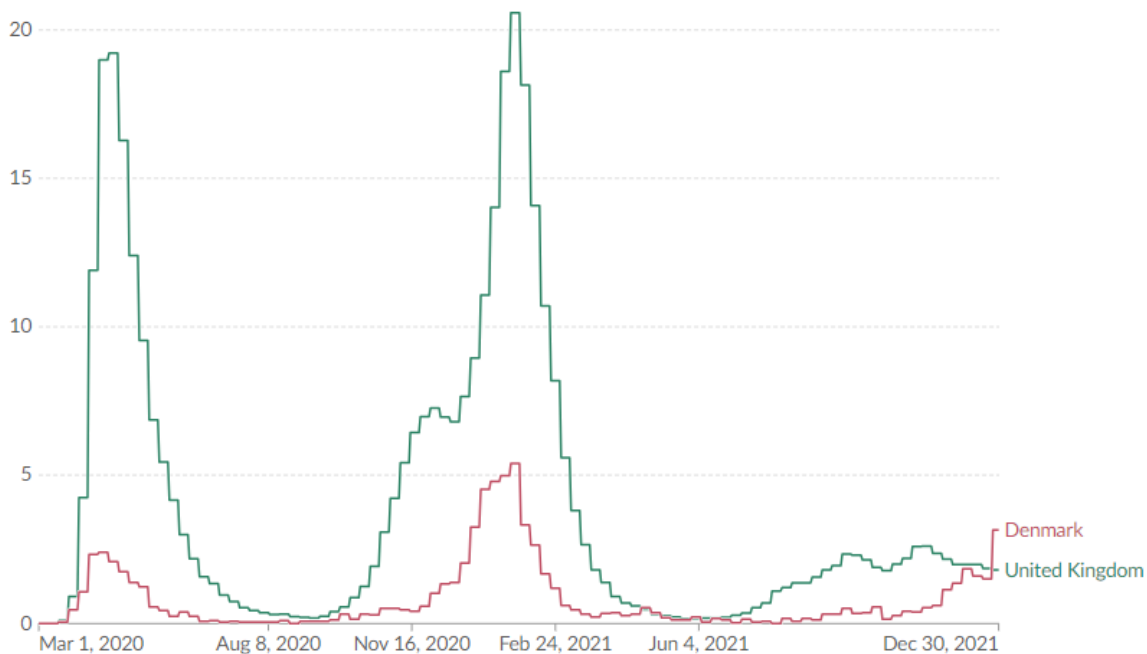

Data source: WHO COVID-19 Dashboard

[CC BY](#)

Table S1: Danish income quintile thresholds by age

| Age | p20_EUR | p40_EUR | p60_EUR | p80_EUR |
|-----|---------|---------|---------|---------|
| 18  | 25182   | 72916   | 113666  | 150954  |
| 19  | 16410   | 45070   | 93213   | 141443  |
| 20  | 13808   | 26629   | 52777   | 111849  |
| 21  | 13584   | 23915   | 39847   | 75574   |
| 22  | 14709   | 24972   | 40259   | 69040   |
| 23  | 16221   | 27728   | 43680   | 70735   |
| 24  | 16392   | 28706   | 43212   | 66016   |

|    |       |       |        |        |
|----|-------|-------|--------|--------|
| 25 | 19506 | 34540 | 51115  | 75810  |
| 26 | 22470 | 40495 | 59474  | 84861  |
| 27 | 27020 | 45627 | 66811  | 91558  |
| 28 | 30462 | 50242 | 73609  | 97650  |
| 29 | 33471 | 54836 | 80029  | 103119 |
| 30 | 36405 | 59234 | 84719  | 107529 |
| 31 | 38774 | 63156 | 88893  | 111923 |
| 32 | 40835 | 66083 | 92045  | 115296 |
| 33 | 42702 | 68970 | 94971  | 119104 |
| 34 | 44419 | 71603 | 97645  | 122261 |
| 35 | 45197 | 73873 | 99855  | 125086 |
| 36 | 46870 | 75894 | 101873 | 128082 |
| 37 | 48078 | 78599 | 104282 | 131261 |
| 38 | 48998 | 79903 | 105971 | 133703 |
| 39 | 50160 | 81780 | 107947 | 136459 |
| 40 | 50379 | 82324 | 109129 | 138591 |
| 41 | 51080 | 83139 | 109933 | 139837 |
| 42 | 51717 | 84015 | 111295 | 142179 |
| 43 | 51668 | 84826 | 112578 | 144983 |

|    |       |       |        |        |
|----|-------|-------|--------|--------|
| 44 | 51499 | 84458 | 112709 | 146030 |
| 45 | 51923 | 85140 | 113956 | 147824 |
| 46 | 51986 | 85092 | 114176 | 148753 |
| 47 | 51048 | 84006 | 113080 | 148934 |
| 48 | 50309 | 83096 | 112877 | 148588 |
| 49 | 50456 | 83042 | 112546 | 148340 |
| 50 | 50419 | 82667 | 111829 | 148155 |
| 51 | 50217 | 82488 | 110889 | 146641 |
| 52 | 49285 | 80909 | 109046 | 144300 |
| 53 | 48459 | 79177 | 106941 | 141183 |
| 54 | 48745 | 78956 | 106260 | 139949 |
| 55 | 47567 | 76712 | 103671 | 136536 |
| 56 | 47100 | 75951 | 102339 | 133952 |
| 57 | 45956 | 73882 | 100135 | 131312 |
| 58 | 46055 | 72543 | 98054  | 128610 |
| 59 | 45267 | 70752 | 95914  | 125318 |
| 60 | 44704 | 68828 | 93708  | 123101 |
| 61 | 44527 | 66792 | 90723  | 119574 |
| 62 | 41205 | 60450 | 82624  | 112747 |

|    |       |       |       |        |
|----|-------|-------|-------|--------|
| 63 | 38763 | 57002 | 76277 | 105089 |
| 64 | 37439 | 53745 | 71035 | 98313  |
| 65 | 36607 | 49956 | 65004 | 91186  |
| 66 | 35667 | 48443 | 62382 | 85981  |
| 67 | 34423 | 46849 | 59731 | 81559  |
| 68 | 34403 | 45971 | 58114 | 79102  |
| 69 | 34222 | 45431 | 56805 | 76917  |
| 70 | 33622 | 44319 | 55098 | 74172  |
| 71 | 33375 | 43675 | 53797 | 72148  |
| 72 | 32626 | 42808 | 52307 | 70001  |
| 73 | 32027 | 41881 | 50661 | 67358  |
| 74 | 31353 | 40825 | 49147 | 66004  |
| 75 | 30837 | 39814 | 47483 | 64164  |
| 76 | 30303 | 38894 | 45992 | 61614  |
| 77 | 29797 | 37666 | 44750 | 59413  |
| 78 | 29559 | 37001 | 43971 | 58162  |
| 79 | 29370 | 36193 | 43190 | 56651  |
| 80 | 28757 | 35022 | 42021 | 54662  |
| 81 | 28385 | 34129 | 40959 | 52711  |

|     |       |       |       |       |
|-----|-------|-------|-------|-------|
| 82  | 27844 | 32924 | 39839 | 50633 |
| 83  | 27550 | 32167 | 39079 | 49887 |
| 84  | 27280 | 31707 | 38525 | 48224 |
| 85  | 26758 | 31061 | 37573 | 46637 |
| 86  | 26684 | 30875 | 37046 | 45868 |
| 87  | 26416 | 30562 | 36288 | 45061 |
| 88  | 26201 | 30239 | 35620 | 44415 |
| 89  | 26352 | 30046 | 35183 | 43689 |
| 90  | 26066 | 29829 | 34498 | 42868 |
| 91  | 26109 | 29693 | 33904 | 42409 |
| 92  | 25861 | 29545 | 33560 | 41600 |
| 93  | 25777 | 29471 | 33491 | 41447 |
| 94  | 25748 | 29217 | 32653 | 40505 |
| 95  | 25787 | 29125 | 32621 | 40789 |
| 96  | 25500 | 29017 | 32155 | 39489 |
| 97  | 25182 | 29109 | 32050 | 38953 |
| 98  | 26479 | 29237 | 32696 | 40218 |
| 99  | 26264 | 29587 | 32396 | 40124 |
| 100 | 25613 | 28769 | 32105 | 38579 |

## Information governance and ethical approval

Patient data has been pseudonymised for analysis and linkage using industry standard cryptographic hashing techniques; all pseudonymised datasets transmitted for linkage onto OpenSAFELY are encrypted; access to the NHS England OpenSAFELY COVID-19 service is via a virtual private network (VPN) connection; the researchers hold contracts with NHS England and only access the platform to initiate database queries and statistical models; all database activity is logged; only aggregate statistical outputs leave the platform environment following best practice for anonymisation of results such as statistical disclosure control for low cell counts [1]

The service adheres to the obligations of the UK General Data Protection Regulation (UK GDPR) and the Data Protection Act 2018. The service previously operated under notices initially issued in February 2020 by the the Secretary of State under Regulation 3(4) of the Health Service (Control of Patient Information) Regulations 2002 (COPI Regulations), which required organisations to process confidential patient information for COVID-19 purposes; this set aside the requirement for patient consent [2]. As of 1 July 2023, the Secretary of State has requested that NHS England continue to operate the Service under the COVID-19 Directions 2020 [3]. In some cases of data sharing, the common law duty of confidence is met using, for example, patient consent or support from the Health Research Authority Confidentiality Advisory Group [4].

Taken together, these provide the legal bases to link patient datasets using the service. GP practices, which provide access to the primary care data, are required to share relevant health information to support the public health response to the pandemic, and have been informed of how the service operates.

- [1] ISB1523: Anonymisation Standard for Publishing Health and Social Care Data. NHS Digit n.d. <https://digital.nhs.uk/data-and-information/information-standards/information-standards-and-data-collections-including-extractions/publications-and-notifications/standards-and-collections/isb1523-anonymisation-standard-for-publishing-health-and-social-care-data> (accessed September 20, 2023).
- [2] [Withdrawn] [withdrawn] Coronavirus (COVID-19): notice under regulation 3(4) of the Health Service (Control of Patient Information) Regulations 2002 – general. GOVUK 2022. <https://www.gov.uk/government/publications/coronavirus-covid-19-notification-of-data-controllers-to-share-information/coronavirus-covid-19-notice-under-regulation-34-of-the-health-service-control-of-patient-information-regulations-2002-general--2> (accessed September 20, 2023).
- [3] COVID-19 Public Health Directions 2020. NHS Digit n.d. <https://digital.nhs.uk/about-nhs-digital/corporate-information-and-documents/directions-and-data-provision-notices/secretary-of-state-directions/covid-19-public-health-directions-2020> (accessed September 20, 2023).
- [4] Confidentiality Advisory Group. Health Res Auth n.d. <https://www.hra.nhs.uk/about-us/committees-and-services/confidentiality-advisory-group/> (accessed September 20, 2023).



Table S2: Characteristics of English and Danish cohorts as of 1st March 2019

| Characteristic |                    | England*<br>N=15,623,860<br>n (%) | Denmark<br>N= 4514317<br>n (%) |
|----------------|--------------------|-----------------------------------|--------------------------------|
| Age category   | 18 - 40 years      | 5,561,685<br>(35.6)               | 1,557,900<br>(34.5)            |
|                | 41 - 60 years      | 5,222,525<br>(33.4)               | 1,547,804<br>(34.3)            |
|                | 61 - 80 years      | 3,918,280<br>(25.1)               | 1,179,017<br>(26.1)            |
|                | >80 years          | 921,370 (5.9)                     | 229,596<br>(5.1)               |
| Sex            | Female             | 7,913,915<br>(50.7)               | 2,293,371<br>(50.8)            |
|                | Male               | 7,709,950<br>(49.3)               | 2,220,946<br>(49.2)            |
| Deprivation*   | 1 (Most deprived)  | 3,064,460<br>(19.6)               | 885,179<br>(19.6)              |
|                | 2                  | 3,114,535<br>(19.9)               | 905,664<br>(20.1)              |
|                | 3                  | 3,387,880<br>(21.7)               | 907,145<br>(20.1)              |
|                | 4                  | 3,169,585<br>(20.3)               | 908,171<br>(20.1)              |
|                | 5 (Least deprived) | 2,887,405<br>(18.5)               | 908,158<br>(20.1)              |
| Rural-Urban    | Rural              | 3,376,165<br>(21.6)               | -                              |
|                | Urban              | 12,247,700<br>(78.4)              | -                              |

|          |  |                 |                   |
|----------|--|-----------------|-------------------|
| Diabetes |  | 1,201,440 (7.7) | 309,468<br>(6.9)  |
| Asthma   |  | 1,351,940 (8.7) | 627,288<br>(13.9) |
| COPD     |  | 486,310 (3.1)   | 440,972<br>(9.8)  |

\*England data is rounded to the nearest 5.

**Table S3: Characteristics of English and Danish cohorts as of 1st March 2021**

| Characteristic |                   | England*<br>N=16,139,075<br>n (%) | Denmark<br>N= 4358665<br>n (%) |
|----------------|-------------------|-----------------------------------|--------------------------------|
| Age category   | 18 - 40 years     | 5,636,175<br>(34.9)               | 1,380,568<br>(31.7)            |
|                | 41 - 60 years     | 5,333,495 (33)                    | 1,529,705<br>35.1              |
|                | 61 - 80 years     | 4,126,510<br>(25.6)               | 1,202,524<br>(27.6)            |
|                | >80 years         | 1,042,895 (6.5)                   | 245,868<br>(5.6)               |
| Sex            | Female            | 8,157,995<br>(50.5)               | 2,218,928<br>(50.9)            |
|                | Male              | 7,981,085<br>(49.5)               | 2,139,737<br>(49.1)            |
| Deprivation*   | 1 (Most deprived) | 3,176,660<br>(19.7)               | 830,850<br>(19.1)              |
|                | 2                 | 3,225,975 (20)                    | 872,689<br>(20.0)              |
|                | 3                 | 3,499,040<br>(21.7)               | 880,638<br>(20.2)              |
|                | 4                 | 3,266,395<br>(20.2)               | 886,462<br>(20.3)              |

|             |                    |                      |                   |
|-------------|--------------------|----------------------|-------------------|
|             | 5 (Least deprived) | 2,971,010<br>(18.4)  | 888,026<br>(20.4) |
| Rural-Urban | Rural              | 3,467,460<br>(21.5)  | -                 |
|             | Urban              | 12,671,620<br>(78.5) | -                 |
| Diabetes    |                    | 1,316,685 (8.2)      | 330,801<br>(7.6)  |
| Asthma      |                    | 1,426,670 (8.8)      | 634,776<br>(14.6) |
| COPD        |                    | 516,940 (3.2)        | 453,375<br>(10.4) |

\*England data is rounded to the nearest 5.

Table S4 Estimated number of events during the pre-pandemic period (May 2018-February 2020) and during the pandemic period (March 2020-December 2021) with and without COVID-19 restrictions in England.

| Outcome       | Deprivation quintile | Estimated number of events pre-pandemic | Estimated number of events during pandemic period if pre-pandemic trends continued | Estimated number of events during pandemic with COVID-19 restrictions | Difference in estimated events with and without COVID-19 restrictions | % difference in estimated events with and without COVID-19 restrictions |
|---------------|----------------------|-----------------------------------------|------------------------------------------------------------------------------------|-----------------------------------------------------------------------|-----------------------------------------------------------------------|-------------------------------------------------------------------------|
|               |                      | n (95% confidence interval)             |                                                                                    |                                                                       |                                                                       | % (95% confidence interval)                                             |
| Heart failure | 1 (Most deprived)    | 8,512<br>(8,090 - 8,955)                | 14,636<br>(13,514 - 15,853)                                                        | 12,028<br>(11,504 - 12,576)                                           | -2608                                                                 | -17.8                                                                   |
|               | 2                    | 8,168<br>(7,866 - 8,482)                | 14,035<br>(13,062 - 15,084)                                                        | 11,832<br>(11,441 - 12,236)                                           | -2203                                                                 | -15.7                                                                   |
|               | 3                    | 8,378<br>(8,104 - 8,662)                | 14,375<br>(13,408 - 15,414)                                                        | 12,431<br>(12,069 - 12,803)                                           | -1944                                                                 | -13.5                                                                   |
|               | 4                    | 7,398<br>(7,104 - 7,704)                | 12,671<br>(11,773 - 13,641)                                                        | 11,240<br>(10,853 - 11,641)                                           | -1431                                                                 | -11.3                                                                   |

|                       |                    |                          |                             |                             |       |      |
|-----------------------|--------------------|--------------------------|-----------------------------|-----------------------------|-------|------|
|                       | 5 (Least deprived) | 6,355<br>(6,016 - 6,714) | 10,878<br>(10,015 - 11,818) | 9,899<br>(9,447 - 10,373)   | -979  | -9   |
|                       |                    |                          |                             |                             |       |      |
| Myocardial infarction | 1                  | 9,683<br>(9,420 - 9,954) | 11,859<br>(11,340 - 12,402) | 10,751<br>(10,463 - 11,046) | -1108 | -9.3 |
|                       | 2                  | 9,421<br>(9,229 - 9,617) | 11,536<br>(11,077 - 12,016) | 10,507<br>(10,296 - 10,723) | -1029 | -8.9 |
|                       | 3                  | 9,802<br>(9,626 - 9,982) | 11,980<br>(11,516 - 12,462) | 10,962<br>(10,769 - 11,160) | -1018 | -8.5 |
|                       | 4                  | 8,779<br>(8,590 - 8,973) | 10,707<br>(10,273 - 11,159) | 9,844<br>(9,635 - 10,056)   | -863  | -8.1 |
|                       | 5                  | 7,651<br>(7,430 - 7,878) | 9,320<br>(8,902 - 9,759)    | 8,609<br>(8,365 - 8,860)    | -711  | -7.6 |
|                       |                    |                          |                             |                             |       |      |

|                        |   |                           |                             |                             |      |      |
|------------------------|---|---------------------------|-----------------------------|-----------------------------|------|------|
| Stroke                 | 1 | 8,895<br>(8,661 - 9,135)  | 11,697<br>(11,222 - 12,192) | 12,316<br>(12,026 - 12,613) | 619  | 5.3  |
|                        | 2 | 9,068<br>(8,890 - 9,249)  | 11,921<br>(11,485 - 12,373) | 12,580<br>(12,357 - 12,807) | 659  | 5.5  |
|                        | 3 | 9,884<br>(9,719 - 10,053) | 12,970<br>(12,515 - 13,443) | 13,719<br>(13,509 - 13,932) | 749  | 5.8  |
|                        | 4 | 9,275<br>(9,092 - 9,461)  | 12,145<br>(11,700 - 12,608) | 12,876<br>(12,646 - 13,109) | 731  | 6    |
|                        | 5 | 8,467<br>(8,243 - 8,698)  | 11,078<br>(10,626 - 11,549) | 11,770 (11,491 -<br>12,056) | 692  | 6.2  |
|                        |   |                           |                             |                             |      |      |
| Venous thromboembolism | 1 | 6,272<br>(6,046 - 6,507)  | 8,549<br>(8,063 - 9,065)    | 7,703 (7,441 - 7,974)       | -846 | -9.9 |
|                        | 2 | 6,248<br>(6,080 - 6,422)  | 8,514<br>(8,075 - 8,977)    | 7,687 (7,490 - 7,889)       | -827 | -9.7 |

|  |   |                          |                          |                       |      |      |
|--|---|--------------------------|--------------------------|-----------------------|------|------|
|  | 3 | 6,656<br>(6,499 - 6,816) | 9,052<br>(8,602 - 9,528) | 8,190 (8,007 - 8,377) | -862 | -9.5 |
|  | 4 | 6,103<br>(5,933 - 6,278) | 8,284<br>(7,853 - 8,740) | 7,510 (7,312 - 7,714) | -774 | -9.3 |
|  | 5 | 5,444<br>(5,241 - 5,656) | 7,383<br>(6,957 - 7,836) | 6,707 (6,471 - 6,952) | -676 | -9.2 |

Table S5 Estimated number of events during the pre-pandemic period (May 2018-February 2020) and during the pandemic period (March 2020-December 2021) with and without COVID-19 restrictions in Denmark.

| Outcome | Deprivation quintile | Estimated number of events pre-pandemic | Estimated number of events during pandemic period if pre-pandemic trends continued | Estimated number of events during pandemic with COVID-19 restrictions | Difference in estimated events with and without COVID-19 restrictions | % difference in estimated events with and without COVID-19 restrictions |
|---------|----------------------|-----------------------------------------|------------------------------------------------------------------------------------|-----------------------------------------------------------------------|-----------------------------------------------------------------------|-------------------------------------------------------------------------|
|         |                      | n (95% confidence interval)             |                                                                                    |                                                                       |                                                                       |                                                                         |

|                       |   |                       |                       |                       |       |       |
|-----------------------|---|-----------------------|-----------------------|-----------------------|-------|-------|
| Heart failure         | 1 | 2,434 (2,327 - 2,546) | 2,176 (2,013 - 2,352) | 2,240 (2,131 - 2,355) | 64    | 2.9   |
|                       | 2 | 2,249 (2,174 - 2,327) | 2,045 (1,903 - 2,198) | 2,110 (2,033 - 2,190) | 65    | 3.2   |
|                       | 3 | 2,021 (1,960 - 2,085) | 1,849 (1,723 - 1,984) | 1,912 (1,849 - 1,977) | 63    | 3.4   |
|                       | 4 | 1,815 (1,747 - 1,885) | 1,668 (1,549 - 1,796) | 1,728 (1,659 - 1,801) | 60    | 3.6   |
|                       | 5 | 1,627 (1,546 - 1,711) | 1,497 (1,380 - 1,624) | 1,555 (1,471 - 1,644) | 58    | 3.9   |
|                       |   |                       |                       |                       |       |       |
| Myocardial infarction | 1 | 3,660 (3,516 - 3,810) | 4,626 (4,315 - 4,961) | 3,613 (3,462 - 3,770) | -1013 | -21.9 |
|                       | 2 | 3,200 (3,104 - 3,299) | 4,116 (3,859 - 4,390) | 3,190 (3,089 - 3,293) | -926  | -22.5 |



|        |   |                       |                       |                       |      |       |
|--------|---|-----------------------|-----------------------|-----------------------|------|-------|
|        | 3 | 2,721 (2,645 - 2,801) | 3,521 (3,304 - 3,752) | 2,708 (2,628 - 2,790) | -813 | -23.1 |
|        | 4 | 2,312 (2,231 - 2,396) | 3,005 (2,810 - 3,214) | 2,293 (2,208 - 2,382) | -712 | -23.7 |
|        | 5 | 1,961 (1,869 - 2,058) | 2,552 (2,368 - 2,750) | 1,933 (1,836 - 2,035) | -619 | -24.3 |
|        |   |                       |                       |                       |      |       |
| Stroke | 1 | 3,409 (3,295 - 3,527) | 3,433 (3,239 - 3,639) | 3,097 (2,983 - 3,215) | -336 | -9.8  |
|        | 2 | 3,170 (3,090 - 3,253) | 3,248 (3,078 - 3,427) | 3,007 (2,924 - 3,092) | -241 | -7.4  |
|        | 3 | 2,867 (2,801 - 2,935) | 2,955 (2,804 - 3,114) | 2,807 (2,739 - 2,877) | -148 | -5    |
|        | 4 | 2,590 (2,518 - 2,665) | 2,682 (2,539 - 2,834) | 2,615 (2,538 - 2,694) | -67  | -2.5  |

|                        |   |                       |                       |                       |      |      |
|------------------------|---|-----------------------|-----------------------|-----------------------|------|------|
|                        | 5 | 2,337 (2,250 - 2,427) | 2,423 (2,280 - 2,575) | 2,424 (2,328 - 2,524) | 1    | 0    |
|                        |   |                       |                       |                       |      |      |
| Venous thromboembolism | 1 | 3,932 (3,811 - 4,056) | 4,606 (4,372 - 4,853) | 4,224 (4,092 - 4,361) | -382 | -8.3 |
|                        | 2 | 3,688 (3,603 - 3,776) | 4,396 (4,191 - 4,612) | 4,076 (3,980 - 4,174) | -320 | -7.3 |
|                        | 3 | 3,365 (3,295 - 3,437) | 4,034 (3,850 - 4,228) | 3,782 (3,703 - 3,863) | -252 | -6.2 |
|                        | 4 | 3,067 (2,989 - 3,147) | 3,694 (3,517 - 3,880) | 3,501 (3,413 - 3,592) | -193 | -5.2 |
|                        | 5 | 2,791 (2,696 - 2,888) | 3,366 (3,188 - 3,554) | 3,226 (3,116 - 3,339) | -140 | -4.2 |

Figure S2: Monthly change (first derivative) in percentage of population with hospital admissions for each outcome in England

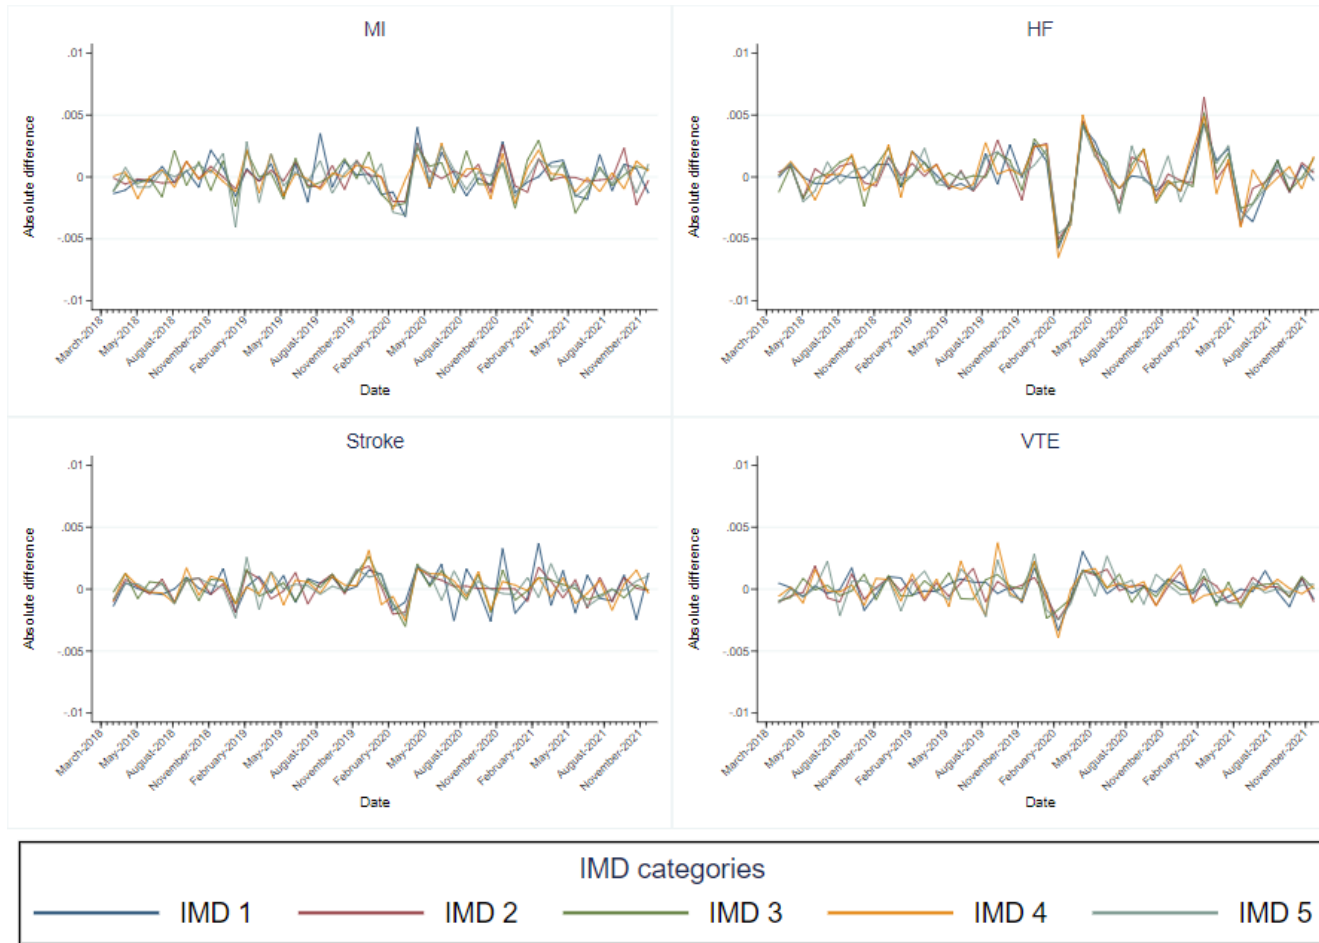

Figure S3: Monthly change (first derivative) in percentage of population with hospital admissions for each outcome in Denmark

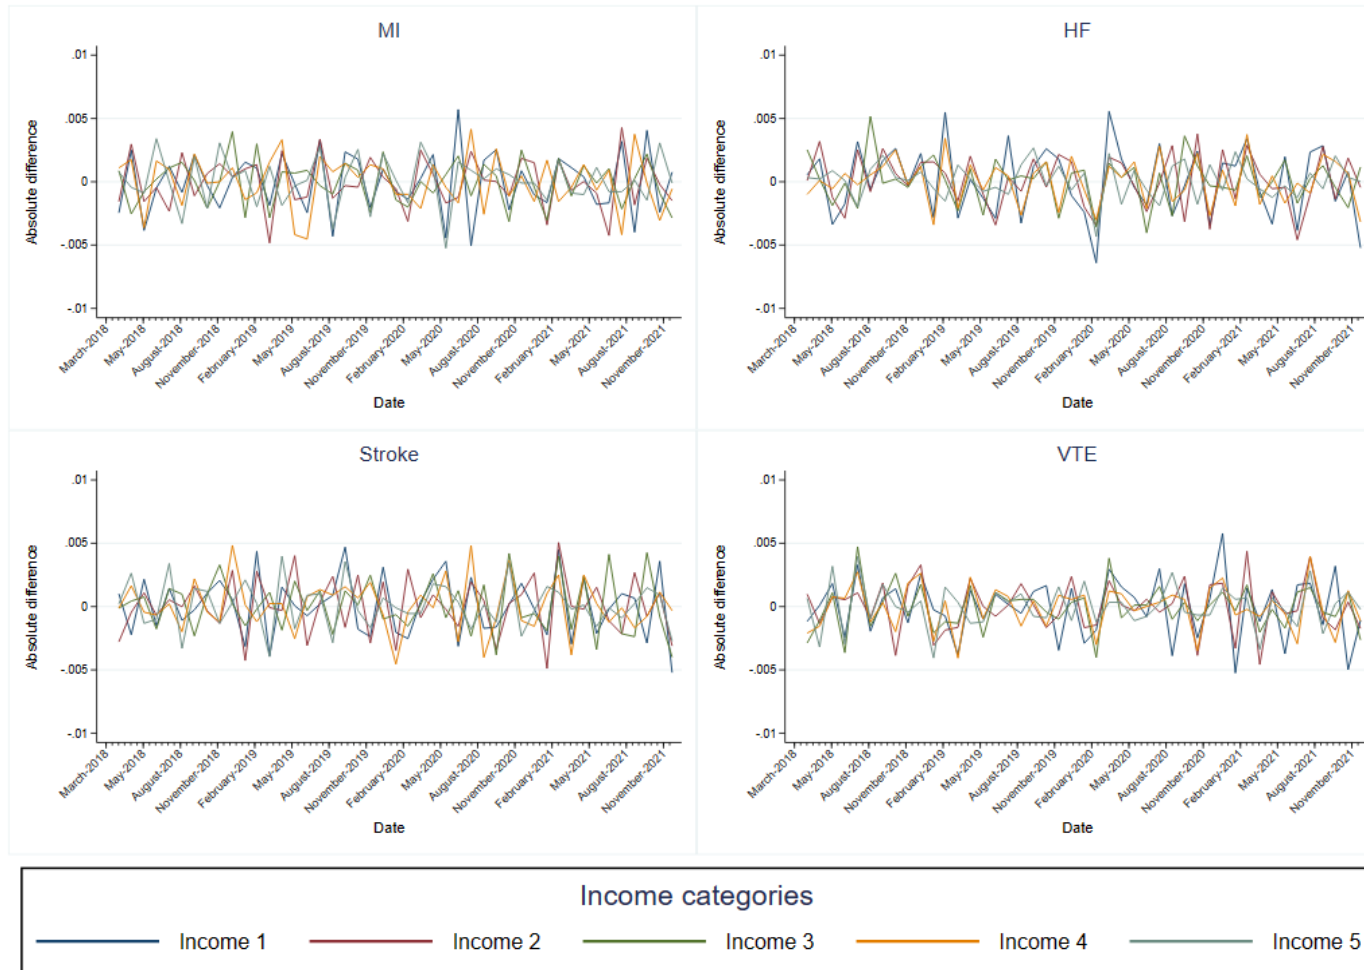

Supplement: bmjopen-14-10-s001.pdf [file bmjopen-14-10-s001.pdf]
